# Supplementary material for: Smad4 and p53 synergize in suppressing autochthonous intestinal cancer
Source: PubMed Central journal article supplement (PMC9089223; doi:10.1002/cam4.4533), 2022-03-11
Supplement: CAM4-11-1925-s001.pdf [file CAM4-11-1925-s001.pdf]

## Supplementary materials and methods

### MICE

Mouse studies were conducted with the approval of the Animal Care and Use Committees of National Cancer Center of Korea. Villin-Cre (*B6.Cg-Tg(Vil-Cre)20Sy*) and *Trp53<sup>F/F</sup>* (*FVB.129-Trp53<sup>tm1Bm</sup>*) mice were provided by the Mouse Models of Human Cancers Consortium. Conditional Smad4 knockout mice (*Smad4<sup>F/F</sup>*) were previously described<sup>1</sup>. Compound conditional knockouts of Smad4 and p53 were bred with *Villin-Cre* mice to perform targeted deletion for these genes in intestinal epithelium. Offspring mice were genotyped using polymerase chain reaction (PCR) assays for tail DNA as described previously<sup>1</sup>. Mice positive for Villin-Cre genes were monitored until they became moribund or showed signs of distress, at which time necropsies were performed. Scheduled sacrifice was also conducted at 10, 15, and 20 weeks of age to evaluate the preneoplastic changes of intestinal mucosa. Intestines were fully examined according to the necropsy protocol described in our previous study<sup>1</sup>. Mesenteric lymph nodes, liver, and lung were harvested at necropsy to assess for metastases. Severe combined immunodeficiency (SCID) mice were purchased from Orient Bio (Seoungnam, Korea). Mouse studies were conducted with the approval of the Animal Care and Use Committees of National Cancer Center of Korea.

The intestine and excised tumors were fixed in neutral buffered 10% formalin, processed by standard methods and embedded in paraffin. H&E slides were interpreted by two pathologists independently according to the criteria (Fig. S2). All of H&E slides were scanned using Aperio ScanScope AT (Aperio Technologies, Inc., Vista, CA) to measure the thicknesses of intestinal epithelium.

For limiting dilution assays, mouse primary cancer cells ( $10^5$ ,  $10^4$ , and  $10^3$  cells) were suspended in 50  $\mu$ l of RPMI and 50  $\mu$ l of Matrigel (356234, BD Biosciences, San Jose) and were injected into the flank subcutaneous tissue of syngeneic (*Villin-Cre*-negative) mice. After 8 weeks of intraperitoneal CWP232291 (150mg/kg, twice per week) (JW Pharmaceutical, Seoul, Korea) or PBS treatment, the mice were euthanized and tumor formation was examined. The frequency of tumor-initiating cells (TICs) was calculated and P-value was evaluated using ELDA webtool (<http://bioinf.wehi.edu.au/software/elda>).

For ionizing radiation (IR) experiments, irradiation was performed using a 6 MV X-ray linear accelerator (Varian 600 CD, Palo Alto, CA USA). A single dose of 10 Gray (Gy) was given at a dose rate of 3 Gy/min on a rotating platform. After irradiation, the animals were taken back to the animal facility and were routinely cared for 24 h.

## Cells

Mouse primary intestinal cancer cell lines used in this study were established from *Villin-Cre;Smad4<sup>F/F</sup>;Trp53<sup>F/F</sup>* mice. These cell lines were cultured at 37°C in a 5% CO<sub>2</sub> humidified incubator in RPMI-1640 medium (Gibco, Grand Island, NY) containing 10% FBS (Gibco). The following reagents were used in cell experiments; BC21 (219334, Millipore, Billerica, MA), CCT031374 (#4675, R&D systems, Minnesota, USA), PKF 118-310 (219331; Calbiochem, San Diego, CA), BH3I-1 (sc221352, Santa Cruz Biotechnology Inc., Santa Cruz, CA), Etoposide (Sigma, St. Louis, USA), and recombinant mouse Wnt3a (1324-WN, R&D Systems).

For tumorsphere formation, single cells were plated at 2,500 cell/ml in serum-free DMEM/F12 (Life Technologies, Gaithersburg, CA, USA), supplemented with 10

ng/ml fibroblast growth factor (R&D Systems), 20 ng/ml epidermal growth factor (R&D Systems), on UltraLow Attachment 24 well plates (Corning, Lowell, MA) for 7 days. Secondary tumorspheres were plated at 1,000 cells per well. Dishes were cultivated for 7 days to enumeration of spheres. Individual spheres  $\geq 100 \mu\text{m}$  from each replicate well were counted using Axiovert 200M (Carl Zeiss, Oberkochen, Germany).

To measure Wnt activity, luciferase assays were carried out using the dual luciferase reporter assay system (Promega, Madison, WI). Wnt/ $\beta$ -catenin activity was evaluated by using Cignal TCF/LEF1 reporter plasmid (CCS-018L, SA Biosciences, Frederick, MD) according to the manufacture's instruction. For stable expression of Smad4, p53, and Bcl-X<sub>L</sub> in primary cultured cells, we used lentiviral transduction system. *Trp53* and *Bcl2l1* genes were cloned into a modified lentiviral vector, named pCDH-CAG-MCS-EF1-Puro, from an original vector, pCDH-CMV-MCS-EF1-Puro (System Biosciences, CA, USA) as described in our previous report<sup>2</sup>. Smad4 gene was cloned into a vector, named pCDH-CAG-MCS-EF1-neo in which a puromycin selection marker was replaced with a neomycin selection marker. The gene cassettes of *Smad4*, *Trp53*, and *Bcl2l1* were amplified from cDNA of the mouse cells using PCR. All cloned genes were validated by using Sanger sequencing. Lentivirus was produced by co-transfecting lentiviral vectors and pMD2.G and psPAX2 constructs (Addgene, Watertown, MA) into 293T cells using lipofectamine 2000 (Invitrogen). Viral supernatants were harvested 48 hours after transfection, filtered through a 0.45  $\mu\text{m}$  filter, and used to infect primary cultured cancer cells with 10  $\mu\text{g/mL}$  polybrene. Cells were treated with 2  $\mu\text{g/mL}$  of puromycin or 250  $\mu\text{g/mL}$  of G418 at 48 hours after viral transduction and were selected for 3 days.

### Supplementary Figure 1.

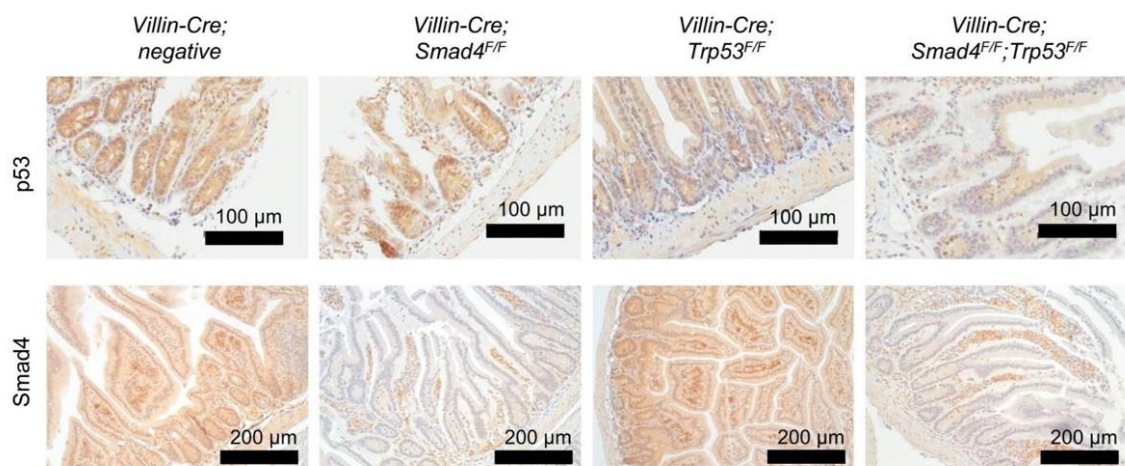

Fig S1. Immunohistochemical analysis of p53 and Smad4 on intestinal epithelium of each genotype. *Villin-Cre;Smad4<sup>F/F</sup>;Trp53<sup>F/F</sup>* mice shows no immunoreactivity for p53 and Smad4 in intestinal epithelium.

### Supplementary Figure 2.

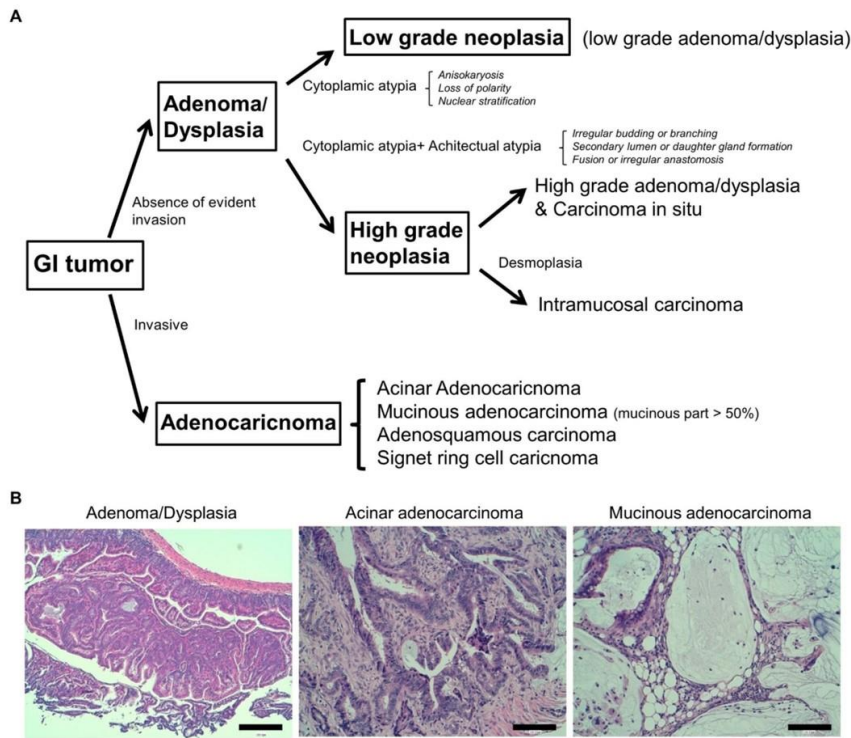

Fig S2. (A) Histological grading criteria for mouse intestinal tumors. (B) Representative H&E images for neoplastic intestinal lesions of *Villin-Cre;Smad4<sup>F/F</sup>;Trp53<sup>F/F</sup>* mice. Bar = 100  $\mu$ m

### Supplementary Figure 3.

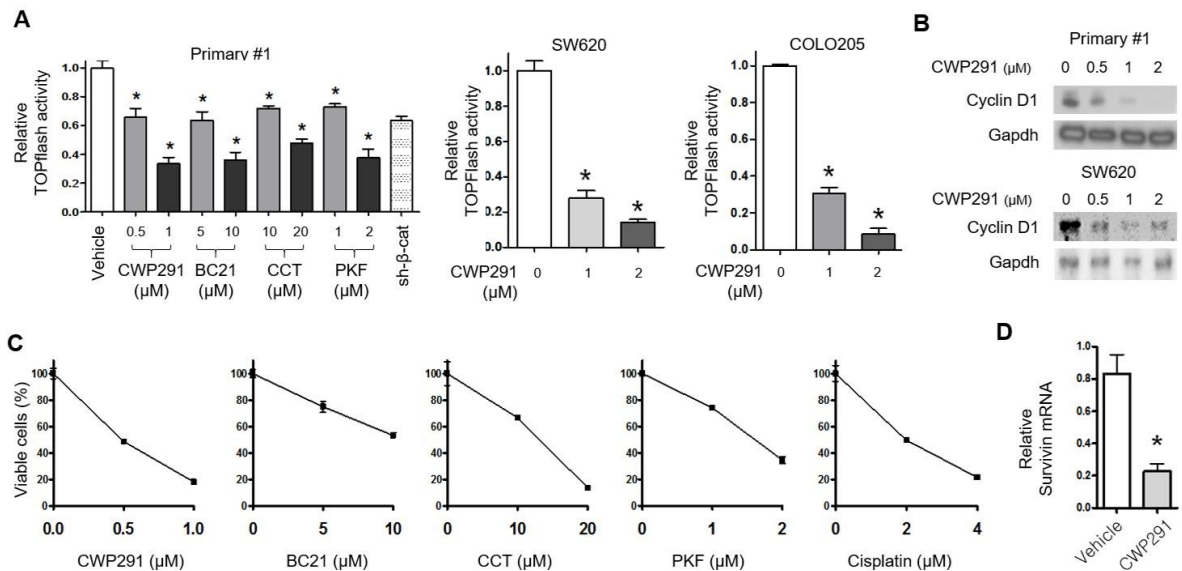

Fig S3. Effect of WNT inhibitors on the cell growth and CSC survival in double knockout cells. CWP291, CWP232291. CCT, CCT031374. PKF, PKF 118-310. (A) Attenuated TOPflash reporter activities after 12 hours of treatment with WNT inhibitors at the indicated doses in primary #1 cell line, human colorectal

cancer cell lines SW620 and COLO205. (B) The inhibitory effect of CWP232291 on the expression of cyclin D1 in primary #1 and SW620 based on western blot analysis. (C) MTT assay to measure growth-inhibitory effects of WNT inhibitors in primary #1 cells. Cells were treated with WNT inhibitors for 48 hours at the indicated doses. 24 hours before the treatment,  $0.25 \times 10^5$  cells were seeded on 6 well cell culture plates. (D) Quantitative real-time RT PCR analysis for mRNA expression of survivin after 24 hours of in-vivo treatment with 100 mg/kg CWP232291 via intraperitoneal injection. (\* $P < 0.05$ , \*\* $P < 0.01$ )

**Supplementary Table 1.** DAVID pathway analysis on the genes up-regulated by > 2-fold in intestinal adenocarcinomas arising from Villin-Cre;Smad4F/F;p53F/F mice (n=2) compared with normal intestinal mucosa from Villin-Cre-negative mice (n=2).

| KEGG_PATHWAY            | P Value | Genes                                                                                                                                                                                                                                                                                                                                                                                                                                       |
|-------------------------|---------|---------------------------------------------------------------------------------------------------------------------------------------------------------------------------------------------------------------------------------------------------------------------------------------------------------------------------------------------------------------------------------------------------------------------------------------------|
| mmu04510:Focal adhesion | 0.000   | PDGFB, PGF, PIP5K1C, CHAD, ILK, PDGFC, PDGFD, AKT3, SHC4, PIK3CG, EGFR, PARVG, ACTN1, FLNC, FLNA, PRKCB, COL1A2, PDGFRA, PDGFRB, RELN, LAMC2, LAMC1, COL1A1, PARVB, IBSP, CAV2, CAV1, TNC, COL3A1, ITGB5, ITGB3, MYL9, IGF1R, LAMB2, RAC2, ITGB8, RAC3, ITGAV, COL6A1, PIK3R5, THBS1, FIGF, THBS2, FN1, THBS4, SPP1, COL4A2, COL4A1, FLT1, FLT4, ITGA1, IGF1, ITGA4, HGF, CAPN2, COL5A2, VAV1, KDR, LAMA2, LAMA1, ITGA9, VWF, LAMA4, LAMA3, |

---

ITGA5, LAMA5, FYN, ITGA8

|                                                    |       |                                                                                                                                                                                                                                                                                                                                                                                                                                                                                                                                                                     |
|----------------------------------------------------|-------|---------------------------------------------------------------------------------------------------------------------------------------------------------------------------------------------------------------------------------------------------------------------------------------------------------------------------------------------------------------------------------------------------------------------------------------------------------------------------------------------------------------------------------------------------------------------|
| mmu04060:Cytokine-cytokine<br>receptor interaction | 0.000 | PDGFB, IL6ST, OSMR, LEPR, IL18, TGFB3, CXCR2,<br>TNFSF18, TGFB1, TGFB2, TNFRSF11B, CXCR4, CSF2RB,<br>CSF3R, IL1B, PDGFC, PDGFD, CSF2RA, IL1A, GHR,<br>EGFR, IL18RAP, LIFR, CCL21A, OSM, INHBB, TNFRSF9,<br>IFNAR2, INHBA, PPBP, CCR5, CCR2, PDGFRA, PDGFRB,<br>IL1R2, CCL3, IL1R1, TNF, CCL2, CXCL5, TNFRSF12A,<br>CSF2RB2, CRLF2, CCR1, CSF1, IL4RA, CXCL2, CCL9,<br>BMP2, CCL8, PF4, IL7R, CCL7, LIF, TNFRSF1B, IL10RA,<br>IL2RG, FIGF, CSF1R, IL18R1, IL6, FLT1, TGFB1, FLT4,<br>TGFB2, HGF, TNFSF9, CCL17, TNFSF8, IL6RA, KDR,<br>CCL11, CXCL14, CXCL13, CXCL16 |
| mmu04610:Complement and<br>coagulation cascades    | 0.000 | C7, C3AR1, A2M, MASP1, C3, F13A1, BDKRB1, C1S,<br>C1QC, C1RA, C1RB, SERPINA1B, SERPINE1, CFH, C2,<br>PLAT, KNG1, KNG2, F10, C5AR1, C4B, SERPING1,<br>SERPINA1E, F7, PLAUR, C1QA, C1QB, VWF, GM5077,<br>C4BP, THBD, CD59B, CD59A, F3, TFPI, PROS1, PLAUI,<br>F2R                                                                                                                                                                                                                                                                                                     |
| mmu04512:ECM-receptor<br>interaction               | 0.000 | IBSP, TNC, NPNT, COL3A1, ITGB5, ITGB3, SDC3, CHAD,<br>CD47, LAMB2, ITGB8, ITGAV, COL6A1, THBS1, THBS2,<br>SPP1, THBS4, FN1, COL4A2, COL4A1, ITGA1, ITGA4,<br>COL5A2, LAMA2, VWF, ITGA9, LAMA1, LAMA4, CD36,<br>LAMA3, ITGA5, LAMA5, ITGA8, COL1A2, RELN, LAMC2,<br>COL1A1, LAMC1                                                                                                                                                                                                                                                                                    |
| mmu04640:Hematopoietic cell<br>lineage             | 0.000 | IL1R2, IL1R1, TNF, CSF1, IL4RA, ANPEP, ITGB3, IL7R,<br>ITGAM, CD22, CSF3R, IL1B, IL1A, CSF2RA, CSF1R, IL6,<br>ITGA1, ITGA4, FCGR1, IL6RA, CD37, CD36, CD59B,<br>CD34, ITGA5, CD59A, CD33, H2-AA, CD14                                                                                                                                                                                                                                                                                                                                                               |
| mmu04670:Leukocyte<br>transendothelial migration   | 0.000 | CLDN8, CLDN4, MMP9, SIPA1, ITGB2, MMP2, ITGAM,<br>CDH5, MYL9, VCAM1, RAC2, CXCR4, PIK3R5, ESAM,<br>MSN, PIK3CG, ICAM1, NCF2, NCF1, NCF4, ACTN1,<br>MAPK11, ITGA4, VAV1, THY1, PRKCB, CYBA, CYBB,<br>RASSF5, PECAM1, CLDN1, JAM2, JAM3                                                                                                                                                                                                                                                                                                                               |
| mmu04810:Regulation of actin                       | 0.000 | FGFR1, ENAH, PDGFB, MRAS, ITGB5, PIP5K1C, ABI2,<br>FGF10, ITGB2, RDX, BDKRB1, ITGB3, ITGAM, MYL9,                                                                                                                                                                                                                                                                                                                                                                                                                                                                   |

|                                            |       |                                                                                                                                                                                                                                                                                                                                                                                             |
|--------------------------------------------|-------|---------------------------------------------------------------------------------------------------------------------------------------------------------------------------------------------------------------------------------------------------------------------------------------------------------------------------------------------------------------------------------------------|
| cytoskeleton                               |       | PFN2, RAC2, ITGAX, ITGB8, RAC3, ITGAV, RRAS, PDGFC, PIK3R5, MSN, PDGFD, FGF2, FN1, PIK3CG, EGFR, ARHGEF6, ITGA1, ACTN1, NCKAP1L, ITGA4, ARHGEF12, VAV1, ITGA9, CHRM2, ITGA5, ITGA8, PDGFRA, PDGFRB, PIP4K2A, CD14, MYH10, PIP4K2B, F2R                                                                                                                                                      |
| mmu04514:Cell adhesion molecules (CAMs)    | 0.000 | CLDN8, CLDN4, ITGB2, CDH2, CDH3, ITGAM, CDH5, SDC3, ALCAM, VCAM1, ITGB8, ITGAV, CD22, ESAM, SELPLG, PTPRC, ICAM1, SELP, PTPRM, SELL, NFASC, NLGN2, ITGA4, NCAM1, SIGLEC1, ITGA9, CD86, CD80, CD34, ITGA8, CD274, PECAM1, CLDN1, H2-AA, VCAN, JAM2, JAM3                                                                                                                                     |
| mmu05410:Hypertrophic cardiomyopathy (HCM) | 0.000 | CACNA2D1, IL6, TNF, ITGA1, TGFB3, IGF1, ITGB5, ITGA4, ITGB3, TPM2, TGFB1, TPM4, TGFB2, LAMA2, ITGA9, ACE, DES, ITGA5, ITGB8, ITGA8, ITGAV, CACNA1C, CACNA1D, SGCB                                                                                                                                                                                                                           |
| mmu05414:Dilated cardiomyopathy            | 0.000 | ADCY4, TNF, ADCY7, TGFB3, ITGB5, ITGB3, TPM2, TGFB1, TPM4, TGFB2, DES, ITGB8, ITGAV, PRKACB, CACNA2D1, ITGA1, IGF1, ITGA4, LAMA2, ITGA9, ITGA5, ITGA8, CACNA1C, CACNA1D, SGCB                                                                                                                                                                                                               |
| mmu04062:Chemokine signaling pathway       | 0.000 | ADCY4, CCL3, CCL2, ADCY7, CXCL5, CCR1, CXCL2, CCL9, CCL8, CXCR2, PF4, CCL7, DOCK2, RAC2, CXCR4, GNG2, PIK3R5, PRKACB, AKT3, SHC4, PIK3CG, LYN, NCF1, CCL21A, VAV1, PRKCB, CCL17, CCL11, GNGT2, ARRB2, CCR5, PPBP, CXCL14, CXCL13, CXCL16, CCR2, GNB4, GRK5                                                                                                                                  |
| mmu05200:Pathways in cancer                | 0.000 | PTGS2, PDGFB, PGF, MMP9, MITF, TGFB3, FGF10, MMP2, GLI3, TGFB1, TGFB2, CSF3R, RARB, FGF2, MYC, AKT3, CSF2RA, PIK3CG, EGFR, AR, RUNX1T1, PRKCB, HIF1A, PDGFRA, PDGFRB, LAMC2, LAMC1, FGFR1, SFP11, ZBTB16, IGF1R, LAMB2, RAC2, RAC3, ITGAV, PIK3R5, RUNX1, FIGF, CSF1R, FN1, BMP4, IL6, COL4A2, COL4A1, TGFB1, TGFB2, FZD1, IGF1, HGF, FZD7, LAMA2, LAMA1, CBLB, LAMA4, RASSF5, LAMA3, LAMA5 |
| mmu04010:MAPK signaling pathway            | 0.000 | MEF2C, PDGFB, TGFB3, FGF10, TGFB1, TGFB2, MAP3K6, MAP3K8, RRAS, IL1B, PRKACB, MYC, FGF2,                                                                                                                                                                                                                                                                                                    |



|                                                                 |       |                                                                                                                                                                                                                                                                          |
|-----------------------------------------------------------------|-------|--------------------------------------------------------------------------------------------------------------------------------------------------------------------------------------------------------------------------------------------------------------------------|
|                                                                 |       | AKT3, IL1A, EGFR, FLNC, FLNA, PRKCB, MAP4K4, ARRB2, GADD45G, PDGFRA, PLA2G2A, PDGFRB, HSPB1, FGFR1, IL1R2, IL1R1, TNF, TM4SF19, MRAS, RAC2, RASGRP3, RAC3, CACNA2D1, TGFBR1, TGFBR2, NR4A1, MAPK11, DUSP4, PLA2G4A, DUSP1, RPS6KA2, CACNA1C, CACNA1D, DUSP7, CD14, DUSP6 |
| mmu05020:Prion diseases                                         | 0.000 | EGR1, C7, IL6, C1QC, NCAM1, C1QA, C1QB, FYN, CASP12, IL1B, LAMC1, PRKACB, IL1A                                                                                                                                                                                           |
| mmu04270:Vascular smooth muscle contraction                     | 0.000 | ADCY4, ADCY7, CALD1, PRKG1, KCNMB1, MYL9, EDNRA, KCNU1, ACTG2, GUCY1A2, GUCY1A3, CALCRL, PRKACB, RAMP2, ACTA2, PRKCH, NPR2, ARHGEF12, PRKCB, PLA2G4A, AVPR1A, MYH11, PLA2G2A, GUCY1B3, CACNA1C, CACNA1D                                                                  |
| mmu04666:Fc gamma R-mediated phagocytosis                       | 0.001 | PIK3CG, PTPRC, DNMT3, PLD2, LYN, MARCKSL1, NCF1, SPHK1, PIP5K1C, VAV1, FCGR1, PRKCB, DOCK2, PLA2G4A, RAC2, FCGR2B, PIK3R5, MARCKS, INPP5D, PPAP2B, AKT3, PIP4K2B                                                                                                         |
| mmu04662:B cell receptor signaling pathway                      | 0.001 | PIK3CG, TM4SF19, LYN, IFITM1, CD72, VAV1, BTK, PRKCB, RASGRP3, FCGR2B, DAPP1, RAC2, RAC3, LILRB3, CD22, PIK3AP1, PIK3R5, INPP5D, AKT3                                                                                                                                    |
| mmu00532:Chondroitin sulfate biosynthesis                       | 0.001 | CSGALNACT1, UST, CHST12, CHST11, CSGALNACT2, CHST14, CHSY1, CHST15, DSE                                                                                                                                                                                                  |
| mmu05412:Arrhythmogenic right ventricular cardiomyopathy (ARVC) | 0.001 | CACNA2D1, ITGA1, GJA1, ACTN1, ITGB5, CDH2, ITGB3, ITGA4, LAMA2, ITGA9, DES, ITGB8, ITGA5, ITGAV, ITGA8, CACNA1C, CACNA1D, SGCB                                                                                                                                           |
| mmu04630:Jak-STAT signaling pathway                             | 0.002 | OSMR, CSF2RB2, IL6ST, LEPR, CRLF2, IL4RA, IL7R, SPRY4, LIF, SPRY1, IL10RA, CSF3R, CSF2RB, IL2RG, PIK3R5, SPRED1, MYC, AKT3, CSF2RA, GHR, PIK3CG, IL6, SOCS3, PIM1, LIFR, IL6RA, OSM, IFNAR2, CBLB                                                                        |
| mmu04540:Gap junction                                           | 0.002 | EGFR, ADCY4, TUBB2B, PDGFB, ADCY7, GJA1, PRKG1, PRKCB, GUCY1A2, PDGFRA, GUCY1A3, PDGFRB, TUBB6, GUCY1B3, PDGFC, PDGFD, PRKACB, TUBA1A, HTR2B                                                                                                                             |
| mmu04350:TGF-beta signaling                                     | 0.003 | BMP4, LTBP1, TNF, TGFBR1, FST, TGFBR2, BMPR2, TGFB3, DCN, TGFB1, TGFB2, INHBB, INHBA, ID2, THBS1,                                                                                                                                                                        |

|                                                    |       |                                                                                                                                                                                   |
|----------------------------------------------------|-------|-----------------------------------------------------------------------------------------------------------------------------------------------------------------------------------|
| pathway                                            |       | MYC, THBS2, BMP8B, THBS4                                                                                                                                                          |
| mmu05218:Melanoma                                  | 0.005 | EGFR, PIK3CG, FGFR1, PDGFB, MITF, IGF1, FGF10, HGF, IGF1R, PDGFRA, PDGFRB, PIK3R5, PDGFC, PDGFD, FGF2, AKT3                                                                       |
| mmu05222:Small cell lung cancer                    | 0.005 | PIK3CG, COL4A2, COL4A1, PTGS2, LAMA2, LAMA1, LAMA4, LAMB2, LAMA3, LAMA5, ITGAV, PIK3R5, LAMC2, LAMC1, RARB, MYC, AKT3, FN1                                                        |
| mmu04664:Fc epsilon RI signaling pathway           | 0.009 | PIK3CG, TNF, LYN, MAPK11, VAV1, PRKCB, BTK, PLA2G4A, RAC2, RAC3, FYN, PLA2G2A, FCER1G, PIK3R5, INPP5D, AKT3, LCP2                                                                 |
| mmu04142:Lysosome                                  | 0.009 | TCIRG1, HYAL1, PLA2G15, GM2A, GUSB, LGMN, HEXB, CTSS, GNS, SLC11A1, CTSL, CTSK, CD68, LAPTM5, AP1S2, CTSE, GALC, CTSD, CTSC, MAN2B1, ATP6V0D2, CTSH                               |
| mmu00603:Glycosphingolipid biosynthesis            | 0.010 | ST3GAL2, A4GALT, FUT9, GBGT1, B3GALNT1, HEXB                                                                                                                                      |
| mmu04620:Toll-like receptor signaling pathway      | 0.012 | PIK3CG, CCL3, IL6, TNF, LY96, MAPK11, TLR7, TLR8, IFNAR2, CD86, IRF5, CD80, MAP3K8, IL1B, PIK3R5, LBP, CD14, AKT3, SPP1                                                           |
| mmu05210:Colorectal cancer                         | 0.014 | EGFR, PIK3CG, TGFBR1, TGFBR2, FZD1, TGFB3, FZD7, TGFB1, TGFB2, IGF1R, RAC2, RAC3, PDGFRA, PDGFRB, PIK3R5, MYC, AKT3                                                               |
| mmu05322:Systemic lupus erythematosus              | 0.017 | C7, TNF, C3, C4B, FCGR4, ACTN1, C1S, C1QC, FCGR1, FCGR3, C1QA, C1QB, C1RA, C1RB, GM5077, CD86, CD80, FCGR2B, H2-AA, C2                                                            |
| mmu04650:Natural killer cell mediated cytotoxicity | 0.024 | PIK3CG, ICAM1, TNF, TM4SF19, FCGR4, ITGB2, VAV1, FCGR3, PRKCB, CD48, IFNAR2, RAET1D, RAC2, RAC3, FYN, FCER1G, PIK3R5, SH3BP2, TYROBP, SHC4, LCP2                                  |
| mmu05212:Pancreatic cancer                         | 0.031 | PIK3CG, EGFR, PGF, ARHGEF6, TGFBR1, TGFBR2, TGFB3, TGFB1, TGFB2, RAC2, RAC3, PIK3R5, FIGF, AKT3                                                                                   |
| mmu04020:Calcium signaling pathway                 | 0.034 | GNA14, ADCY4, TM4SF19, CYSLTR1, ADCY7, TACR1, BDKRB1, ITPKB, EDNRA, EDNRB, ATP2B4, PDE1A, PRKACB, EGFR, SLC25A4, BST1, SPHK1, PRKCB, ADRB2, P2RX7, CHRM2, AVPR1A, PDGFRA, PDGFRB, |

|                                              |       |                                                                                                                                                                                                     |
|----------------------------------------------|-------|-----------------------------------------------------------------------------------------------------------------------------------------------------------------------------------------------------|
|                                              |       | CACNA1C, HTR2B, CACNA1D, PTAFR, F2R                                                                                                                                                                 |
| mmu05215:Prostate cancer                     | 0.041 | PIK3CG, EGFR, FGFR1, AR, PDGFB, IGF1, CREB5, IGF1R, CREB3L2, PDGFRA, PDGFRB, PIK3R5, PDGFC, PDGFD, SRD5A2, AKT3                                                                                     |
| mmu04370:VEGF signaling pathway              | 0.046 | PIK3CG, TM4SF19, PTGS2, SPHK1, MAPK11, PRKCB, KDR, PLA2G4A, RAC2, RAC3, PLA2G2A, HSPB1, PIK3R5, AKT3                                                                                                |
| mmu04621:NOD-like receptor signaling pathway | 0.050 | CCL11, IL6, TNF, CCL2, IL18, CXCL2, PSTPIP1, IL1B, CCL8, MAPK11, NLRP3, CCL7                                                                                                                        |
| mmu04210:Apoptosis                           | 0.060 | PIK3CG, IL1R1, TNF, TM4SF19, CSF2RB2, CAPN2, PRKAR2B, IRAK3, CASP12, CSF2RB, IL1B, PIK3R5, PRKACB, AKT3, IL1A                                                                                       |
| mmu04360:Axon guidance                       | 0.078 | PLXNC1, NRP1, PLXNA4, TM4SF19, FES, ARHGEF12, SLIT2, EPHA3, SLIT3, RAC2, RAC3, CXCR4, FYN, SEMA7A, SEMA3D, SEMA4C, EFNA5, SEMA3A, SEMA4D, SRGAP2                                                    |
| mmu02010:ABC transporters                    | 0.086 | ABCC9, ABCA9, ABCB1B, ABCA8A, ABCD2, ABCC4, ABCA1, ABCA6, ABCG1                                                                                                                                     |
| mmu04520:Adherens junction                   | 0.088 | EGFR, PTPRB, FGFR1, PTPRM, TGFBR1, TGFBR2, ACTN1, SNAI1, IGF1R, RAC2, FYN, RAC3, PTPN1                                                                                                              |
| mmu04144:Endocytosis                         | 0.094 | PIP5K1C, CXCR2, IGF1R, DAB2, CXCR4, IL2RG, EHD2, EHD3, CSF1R, EGFR, FAM125B, DNM3, PLD2, FLT1, TGFBR1, TGFBR2, KDR, RAB11FIP5, ADRB2, RAB31, CBLB, ARRB2, CCR5, SH3KBP1, PDGFRA, GRK5, F2R, PIP4K2B |
| mmu04150:mTOR signaling pathway              | 0.099 | PIK3CG, EIF4EBP1, HIF1A, PGF, RPS6KA2, IGF1, PIK3R5, FIGF, AKT3, DDIT4                                                                                                                              |

---

**Supplementary Table 2.** Tumor-initiating ability according to Sca1 expression in primary mouse intestinal cancer cell lines

| No. of<br>Injected cells | Primary #1 |          | P<br>Value | Primary #2 |       | P<br>value |
|--------------------------|------------|----------|------------|------------|-------|------------|
|                          | Neg.       | Positive |            | Low        | High  |            |
| 1 X 10 <sup>5</sup>      | 80%        | 100%     | 1.39e-05   | 100%       | 100%  | 0.019      |
|                          | (4/5)      | (5/5)    |            | (5/5)      | (5/5) |            |
| 1 X 10 <sup>4</sup>      | 60%        | 100%     | 1.39e-05   | 80%        | 100%  | 0.019      |
|                          | (3/5)      | (5/5)    |            | (4/5)      | (5/5) |            |
| 1 X 10 <sup>3</sup>      | 20%        | 60%      | 1.39e-05   | 60%        | 80%   | 0.019      |
|                          | (2/5)      | (3/5)    |            | (3/5)      | (4/5) |            |
| <b>TIC *</b>             |            |          |            |            |       |            |
| <b>Frequency</b>         | 1/25889    | 1/1090   |            | 1/3596     | 1/622 |            |

TIC frequency was calculated and p value was measured using ELDA webtool.

Abbreviation: TIC, tumor-initiating cell.

**Supplementary Table 3.** DAVID pathway analysis on the genes down-regulated by > 1.5-fold in

CWP291-treated allograft (n=2) compared with vehicle-treated allograft (n=2).

| KEGG_PATHWAY                                 | P-Value | Genes                                                                                                                                                                                         |
|----------------------------------------------|---------|-----------------------------------------------------------------------------------------------------------------------------------------------------------------------------------------------|
| Cytokine-cytokine receptor interaction       | 0.00000 | CCL2, LEPR, CXCL9, TGFB3, IL15, CCL5, TNFSF18, TGFB2, CCL22, XCR1, IL2RB, IL2RA, TGFB2, MET, LIFR, KDR, CCL17, CCL11, TNFRSF9, CCR7, TNFSF10, TNFSF13B, PRLR, CCR2, PDGFRA, NGFR, BMP1B, XCL1 |
| Graft-versus-host disease                    | 0.00008 | KLRA9, H2-M2, LOC641240, KLRA14, H2-AA, H2-T22, GZMB, H2-Q6, KLRD1, H2-DMB2                                                                                                                   |
| Cell adhesion molecules (CAMs)               | 0.00011 | CLDN8, H2-M2, L1CAM, CDH2, H2-Q6, SDC2, H2-DMB2, SDC3, NCAM1, LOC641240, H2-T22, H2-AA, CD4, JAM3                                                                                             |
| Type I diabetes mellitus                     | 0.00089 | H2-M2, LOC641240, H2-AA, H2-T22, GZMB, H2-Q6, PTPRN, H2-DMB2                                                                                                                                  |
| Antigen processing and presentation          | 0.00180 | H2-M2, LOC641240, H2-AA, H2-T22, CD4, H2-Q6, KLRD1, H2-DMB2, KIR3DL1                                                                                                                          |
| Intestinal immune network for IgA production | 0.00210 | TNFSF13B, LOC641240, TGFB3, H2-AA, IL15, H2-DMB2, TGFB2                                                                                                                                       |
| Viral myocarditis                            | 0.00220 | LAMA2, CAV1, H2-M2, LOC641240, H2-AA, H2-T22, H2-Q6, H2-DMB2, MYH10                                                                                                                           |
| Allograft rejection                          | 0.00300 | H2-M2, LOC641240, H2-AA, H2-T22, GZMB, H2-Q6, H2-DMB2                                                                                                                                         |
| ECM-receptor interaction                     | 0.00440 | LAMA2, TNC, ITGA11, RELN, COL11A1, COL5A2, SDC2, SDC3                                                                                                                                         |
| Chemokine signaling pathway                  | 0.00550 | CCL11, CCR7, CCL22, CCL2, CCR2, CXCL9, GRK5, XCL1, CCL5, XCR1, AKT3, CCL17                                                                                                                    |
| Autoimmune thyroid disease                   | 0.00870 | H2-M2, LOC641240, H2-AA, H2-T22, GZMB, H2-Q6, H2-DMB2                                                                                                                                         |
| Focal adhesion                               | 0.01000 | LAMA2, CAV1, TLN2, TNC, MET, ITGA11, PDGFRA, RELN, COL11A1, COL5A2, AKT3, KDR                                                                                                                 |

|                                           |         |                                                                                |
|-------------------------------------------|---------|--------------------------------------------------------------------------------|
| Endocytosis                               | 0.01200 | IL2RB, IL2RA, FGFR3, H2-M2, MET, TGFBR2, PDGFRA, H2-T22, GRK5, H2-Q6, F2R, KDR |
| Colorectal cancer                         | 0.02000 | MET, TGFBR2, TGFB3, FZD1, PDGFRA, AKT3, TGFB2                                  |
| Natural killer cell mediated cytotoxicity | 0.03200 | CD48, TNFSF10, KLRA9, SH2D1B1, KLRA14, KLRK1, GZMB, NCR1, KLRD1                |
| Jak-STAT signaling pathway                | 0.03500 | STAT4, IL2RB, SPRY1, IL2RA, PRLR, LEPR, LIFR, IL15, AKT3                       |
| Complement and coagulation cascades       | 0.03800 | FGG, FGB, C3, C4B, SERPING1, F2R                                               |
| Axon guidance                             | 0.04400 | SEMA5A, EPHA7, PLXNB1, SEMA7A, MET, SEMA3D, L1CAM, SLIT3                       |
| Asthma                                    | 0.04800 | CCL11, LOC641240, H2-AA, H2-DMB2                                               |

---

## Supplementary References

1. Deng M, Hou SY, Tong BD, Yin JY, Xiong W. The Smad2/3/4 complex binds miR-139 promoter to modulate TGFbeta-induced proliferation and activation of human Tenon's capsule fibroblasts through the Wnt pathway. *J Cell Physiol.* 2019;234:13342-13352.
2. Park JW, Jang SH, Park DM, et al. Cooperativity of E-cadherin and Smad4 loss to promote diffuse-type gastric adenocarcinoma and metastasis. *Mol Cancer Res.* 2014;12:1088-1099.
